# Supplementary material for: Towards adaptive deep brain stimulation: clinical and technical notes on a novel commercial device for chronic brain sensing
Source: bioRxiv or medRxiv preprint supplement (doi:10.1101/2021.03.10.21251638), 2021-03-12

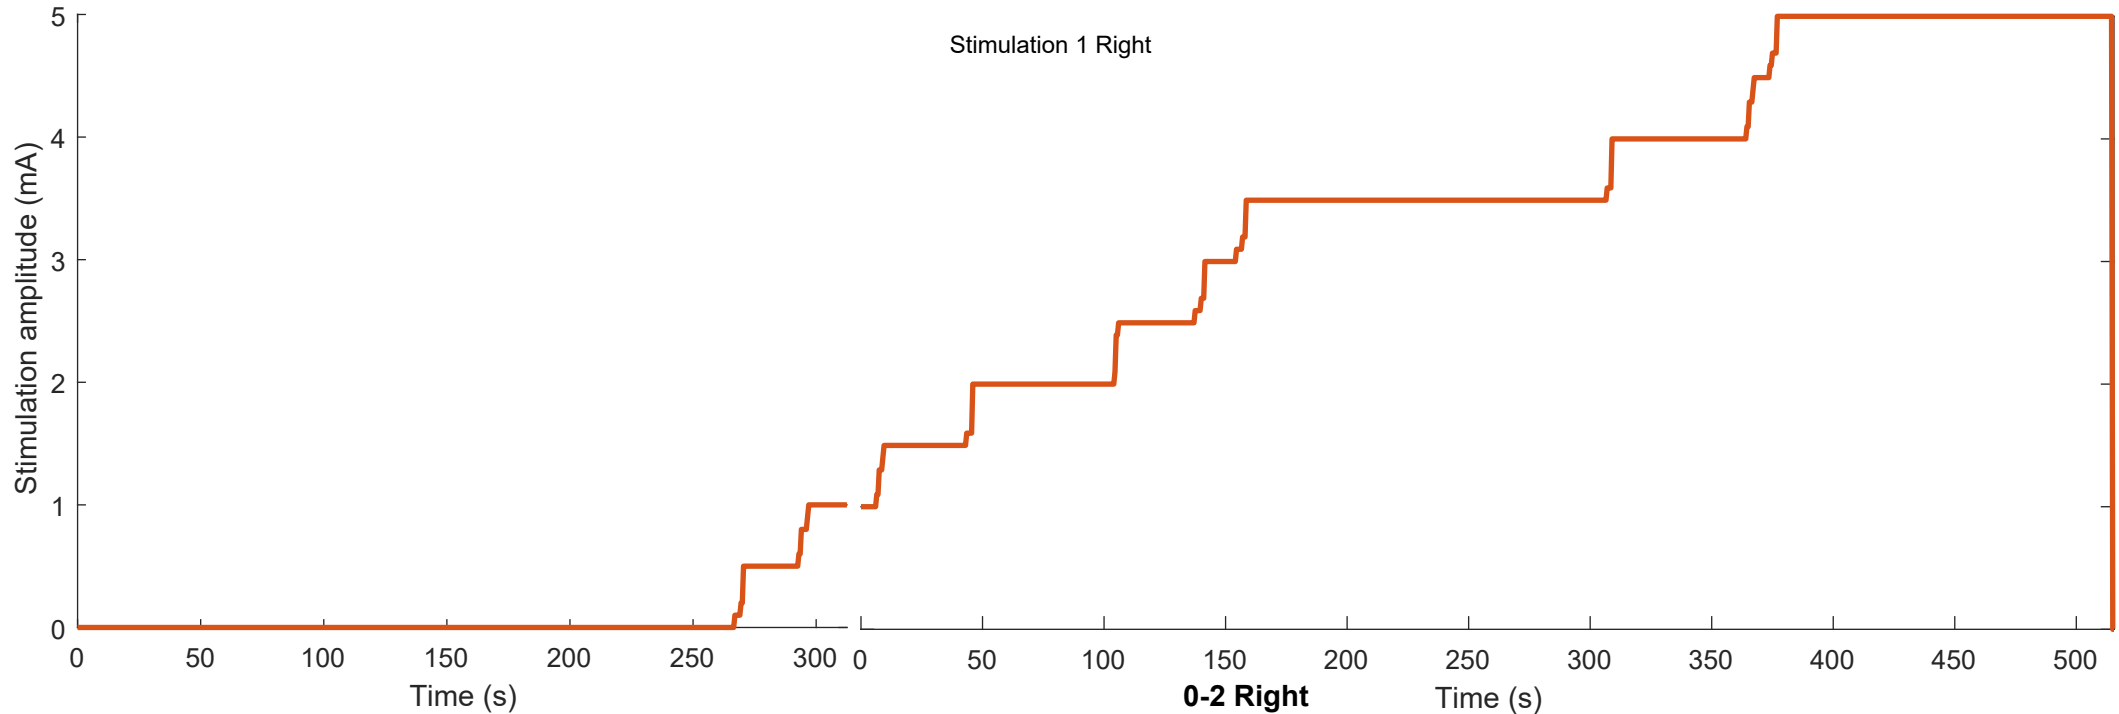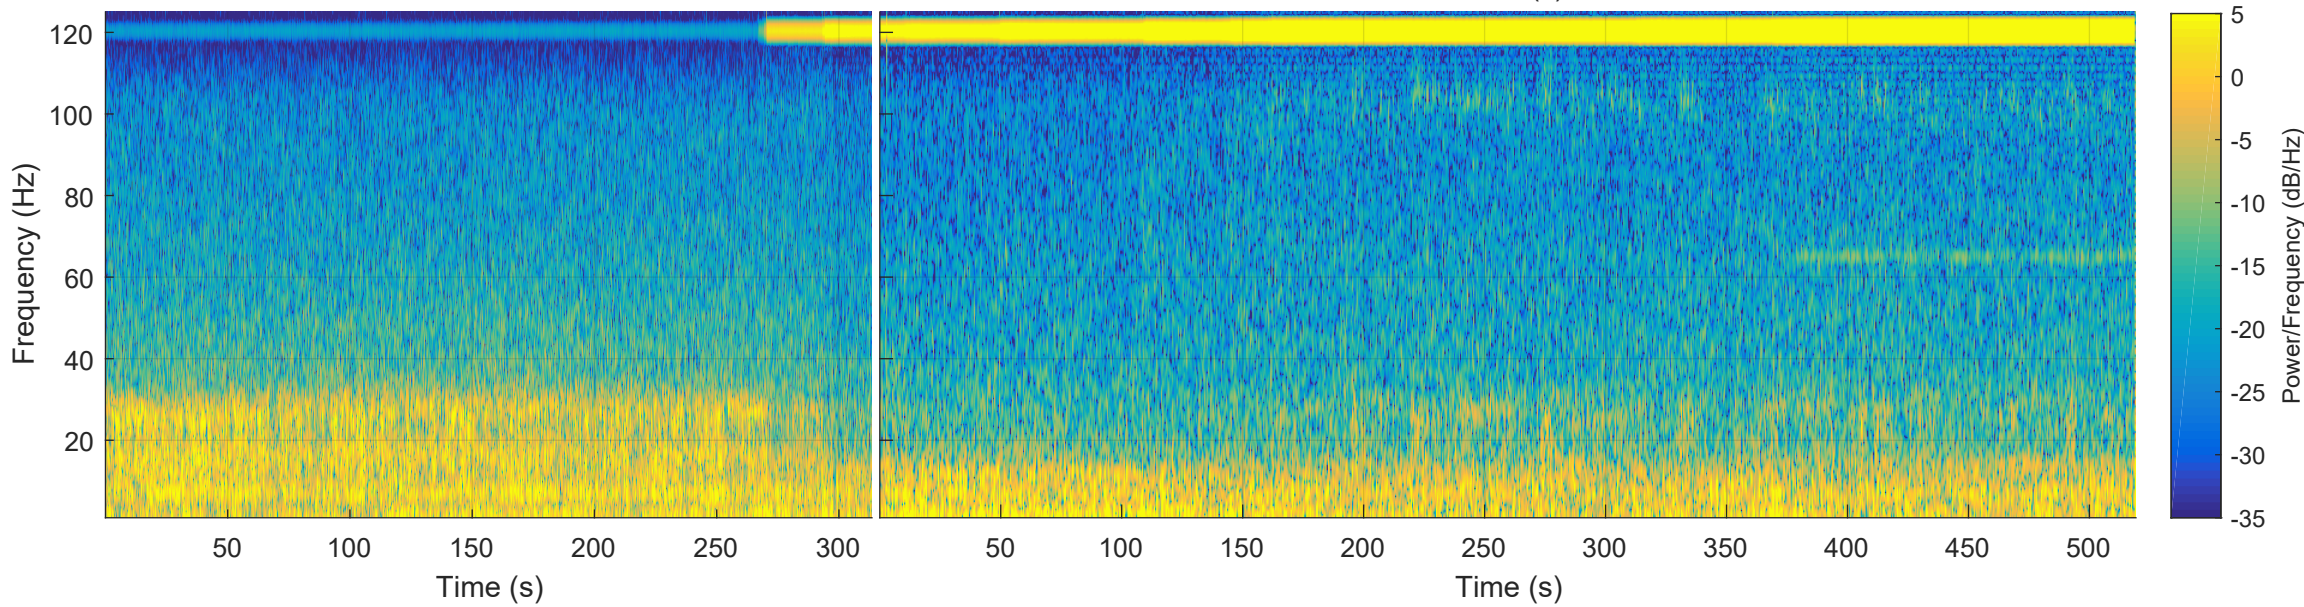

Supplement: Supplementary file [file media-2.pdf]
