# Supplementary material for: Towards adaptive deep brain stimulation: clinical and technical notes on a novel commercial device for chronic brain sensing
Source: bioRxiv or medRxiv preprint supplement (doi:10.1101/2021.03.10.21251638), 2021-03-12
Supplement: Supplementary file [file media-6.pdf]

## Towards adaptive deep brain stimulation: clinical and technical notes on a novel commercial device for chronic brain sensing

Yohann Thenaisie<sup>a,b,\*</sup>, Chiara Palmisano<sup>c,\*</sup>, Andrea Canessa<sup>c,d</sup>, Bart J. Keulen<sup>e,f</sup>, Philipp Capetian<sup>c</sup>, Mayte Castro Jiménez<sup>g</sup>, Julien F. Bally<sup>g</sup>, Elena Manferlotti<sup>c,h</sup>, Laura Beccaria<sup>c</sup>, Rodi Zutt<sup>e</sup>, Grégoire Courtine<sup>b,i,l</sup>, Jocelyne Bloch<sup>b,i</sup>, Niels A. van der Gaag<sup>m</sup>, Carel F. Hoffmann<sup>m</sup>, Eduardo Martin Moraud<sup>a,b,#</sup>, Ioannis U. Isaias<sup>c,#</sup> and M. Fiorella Contarino<sup>e,n,#,§</sup>

§ Corresponding Author M.F. Contarino, Els Borst-Eilersplein 275-2545AA, The Hague, The Netherlands. *E-mail address*: m.f.contarino@lumc.nl

**Supplementary Table 1. Location of maximum beta peak power and best clinical contact on Parkinson's disease patients**

| Subject          | Side | Indefinite streaming at rest          |                        | Stimulation with best clinical outcome |                        |
|------------------|------|---------------------------------------|------------------------|----------------------------------------|------------------------|
|                  |      | Contact pairs with highest beta power | Recording <sup>a</sup> | Stimulation contact                    | Stimulation parameters |
| CH1              | L    | 0-2                                   | IS (69s)               | 1-                                     | 1.7mA, 130Hz, 60µs     |
|                  | R    | 0-2                                   |                        | 1-                                     | 1.6mA, 130Hz, 60µs     |
| CH2              | L    | 1-3                                   | IS (128s)              | 0-                                     | 1.7mA, 130Hz, 60µs     |
|                  | R    | 1-3                                   |                        | 1-                                     | 1.6mA, 130Hz, 60µs     |
| CH3              | L    | 0-3                                   | IS (121s)              | 3-                                     | 3.0mA, 130Hz, 60µs     |
|                  | R    | 0-3                                   |                        | 3-                                     | 1.9mA, 130Hz, 60µs     |
| CH4              | L    | 1-3                                   | IS (113s)              | 2-3- IL <sup>b</sup>                   | 2.0mA, 180Hz, 90µs     |
|                  | R    | No beta <sup>d</sup>                  |                        | 2-3- IL <sup>b</sup>                   | 2.1mA, 180Hz, 90µs     |
| CH6              | L    | 1-2                                   | IS (90s)               | 1-                                     | 1.4mA, 130Hz, 60µs     |
|                  | R    | 1-3                                   |                        | 1-                                     | 1.4mA, 130Hz, 60µs     |
| CH7              | L    | 0-3                                   | IS (107s)              | 1-                                     | 4.7mA, 140Hz, 90µs     |
|                  | R    | 0-3                                   |                        | 3-                                     | 2.9mA, 140Hz, 90µs     |
| CH8              | L    | 0-3                                   | IS (105s)              | 2-                                     | 1.0mA, 245Hz, 60µs     |
|                  | R    | 0-2                                   |                        | 3-                                     | 3.2mA, 245Hz, 60µs     |
| CH9              | L    | 1-2                                   | IS (111s)              | 3-                                     | 2.0mA, 130Hz, 60µs     |
|                  | R    | 1-3                                   |                        | 2-                                     | 2.0mA, 130Hz, 60µs     |
| NL1 <sup>c</sup> | L    | 1-3                                   | Survey                 | 1-                                     | 4.3mA, 130Hz, 60µs     |
|                  | R    | 2-3                                   |                        | 3-                                     | 1.2mA, 130Hz, 60µs     |
| NL2              | L    | No beta <sup>d</sup>                  | Survey                 | 0-1+                                   | 2.8mA, 185Hz, 60µs     |
|                  | R    | No beta <sup>d</sup>                  |                        | 1+2-3-                                 | 3.0mA, 185Hz, 60µs,    |
| PW1 <sup>c</sup> | L    | 0-3                                   | Survey                 | 2+3-                                   | 5.0 mA, 180Hz, 60µs    |
|                  | R    | 1-3                                   |                        | 2-                                     | 2.6mA, 180Hz, 60µs     |

<sup>a</sup> Data from 21 s of *Survey* or from a variable duration of *Survey Indefinite Streaming* (IS) recordings.

<sup>b</sup> Interleaved stimulation (IL).

<sup>c</sup> *Survey* were recorded on four (NL1) or two (PW1) sessions. Only the recording exhibiting the clearest beta peaks was considered for analysis.

<sup>d</sup> In three STN (two patients), no clear beta peak could be identified in any of the contact pairs.
