# Supplementary material for: Towards adaptive deep brain stimulation: clinical and technical notes on a novel commercial device for chronic brain sensing
Source: bioRxiv or medRxiv preprint supplement (doi:10.1101/2021.03.10.21251638), 2021-03-12
Supplement: Supplementary file [file media-7.pdf]

## Towards adaptive deep brain stimulation: clinical and technical notes on a novel commercial device for chronic brain sensing

Yohann Thenaisie<sup>a,b,\*</sup>, Chiara Palmisano<sup>c,\*</sup>, Andrea Canessa<sup>c,d</sup>, Bart J. Keulen<sup>e,f</sup>, Philipp Capetian<sup>c</sup>, Mayte Castro Jiménez<sup>g</sup>, Julien F. Bally<sup>g</sup>, Elena Manferlotti<sup>c,h</sup>, Laura Beccaria<sup>c</sup>, Rodi Zutt<sup>e</sup>, Grégoire Courtine<sup>b,i,l</sup>, Jocelyne Bloch<sup>b,i</sup>, Niels A. van der Gaag<sup>m</sup>, Carel F. Hoffmann<sup>m</sup>, Eduardo Martin Moraud<sup>a,b,#</sup>, Ioannis U. Isaias<sup>c,#</sup> and M. Fiorella Contarino<sup>e,n,#,§</sup>

§ Corresponding Author M.F. Contarino, Els Borst-Eilersplein 275-2545AA, The Hague, The Netherlands. E-mail address: m.f.contarino@lumc.nl

**Supplementary Table 2: Patients with cardiac artefacts**

| Patient | IPG implant site | Modes                              |                                  | Artefactual channel(s)       | Monopolar contact impedance                                                               |
|---------|------------------|------------------------------------|----------------------------------|------------------------------|-------------------------------------------------------------------------------------------|
| NL1     | Chest left       | <i>Streaming and Setup</i>         |                                  | 0-2L<br>1-3R                 | 0L: 967 Ω<br>1L: 1070 Ω (Stim)<br>2L: 1126 Ω                                              |
|         |                  | Stimulation “on” (left or right)   |                                  | —                            | 1R: 971 Ω<br>2R: 962 Ω (Stim)                                                             |
|         |                  | Stimulation “off”                  |                                  | —                            | 3R: 1006 Ω                                                                                |
|         |                  | <i>Setup*</i>                      |                                  | All contact pairs            |                                                                                           |
| NL2     | Chest left       | Session 1                          | <i>Streaming</i>                 | 0-3L<br>1-3L<br>0-2R<br>0-3R | 0R: 1224 Ω<br>1R: 1409 Ω (Stim or OFF/0mA)<br>2R: 1387 Ω (Stim or OFF/0mA)<br>3R: 1592 Ω  |
|         |                  |                                    | Stimulation “on” (left or right) |                              |                                                                                           |
|         |                  | Session 3                          | <i>Streaming</i>                 | 0-3R                         | 0R: 1643 Ω,<br>1R: 1189 Ω (Stim or OFF/0mA)                                               |
|         |                  |                                    | Stimulation “on” (right)         | —                            | 2R: 1186 Ω (Stim or OFF/0mA)                                                              |
|         |                  | <i>Setup*</i>                      |                                  | All contact pairs            | 3R: 1685 Ω                                                                                |
| PW1     | Chest right      | <i>Streaming</i>                   |                                  | 1-3L<br>1-3R                 | 1L: 1046 Ω<br>2L: 1128 Ω (Stim)<br>3L: 1445 Ω<br>1R: 829 Ω<br>2R: 996 (Stim)<br>3R: 815 Ω |
| CH6     | Chest right      | <i>Survey Indefinite Streaming</i> |                                  | 1-3R                         | 1R: 802Ω<br>3R: 785Ω                                                                      |

|  |  |               |                                                |  |
|--|--|---------------|------------------------------------------------|--|
|  |  | <i>Setup*</i> | Five out of six contact pairs (including 1-3R) |  |
|--|--|---------------|------------------------------------------------|--|

\* In the Setup mode, contact pairs were labelled as “artefactual” by the Percept system; in the other modalities, artefacts were detected offline by visual inspection.
